# Supplementary material for: The Mechanism of Flower Opening and Closing Times Revealed By Transcriptome Profiling
Source: Research Square preprint supplement (doi:10.21203/rs.3.rs-1043621/v1), 2021-11-16
Supplement: Supplementary file 1 [file 1c01b3c25315c807e60df937.xlsx]

## Sheet: Sheet1
Table S. The KEGG pathway enrichment analysis of DEGs.
Pathway	ko_ID	Number of DEG in this pathway	Number of all unigene in this pathway	P-value	Corrected_P-value	Enrichment factor	Gene_id	KEGG_Orthology
MA-T1 vs. MA-T2_up
Phenylpropanoid biosynthesis	ko00940	29	212	5.94615e-07	6.30292e-05	2.74172	OP_Unigene_001377;OP_Unigene_001875;OP_Unigene_015566;OP_Unigene_017203;OP_Unigene_020925;OP_Unigene_029662;OP_Unigene_031459;OP_Unigene_037178;OP_Unigene_037293;OP_Unigene_038321;OP_Unigene_038755;OP_Unigene_039223;OP_Unigene_040753;OP_Unigene_041393;OP_Unigene_043077;OP_Unigene_046375;OP_Unigene_110143;OP_Unigene_113833;OP_Unigene_113886;OP_Unigene_114774;OP_Unigene_115927;OP_Unigene_116009;OP_…	K00588+K13065+K00430+K00083+K12355+K00430+K05349+K09755+K05349+K00588+K12355+K00430+K00430+K00430+K00083+K01188+K00430+K05349+K00430+K00083+K13065+K01904+K01188+K10775+K01188+K00487+K05349+K00083+K12355
Circadian rhythm - plant	ko04712	14	89	0.000115745	0.012269	3.15282	OP_Unigene_030570;OP_Unigene_034720;OP_Unigene_035309;OP_Unigene_042550;OP_Unigene_042551;OP_Unigene_045276;OP_Unigene_046035;OP_Unigene_114826;OP_Unigene_128288;OP_Unigene_129315;OP_Unigene_129550;OP_Unigene_130720;OP_Unigene_130721;OP_Unigene_192844	K12124+K12120+K12124+K12130+K12130+K12130+K12129+K12124+K12116+K16240+K12130+K12120+K12120+K12124
Tyrosine metabolism	ko00350	10	57	0.00044606	0.0472824	3.5163	OP_Unigene_011287;OP_Unigene_015348;OP_Unigene_023691;OP_Unigene_029119;OP_Unigene_042049;OP_Unigene_042479;OP_Unigene_120090;OP_Unigene_123851;OP_Unigene_129844;OP_Unigene_192535	K00451+K00457+K18857+K01592+K00276+K01592+K18857+K00451+K18857+K00457
Glycerophospholipid metabolism	ko00564	20	176	0.000457459	0.0484906	2.2776	OP_Unigene_013785;OP_Unigene_018871;OP_Unigene_019643;OP_Unigene_021395;OP_Unigene_025448;OP_Unigene_029939;OP_Unigene_031984;OP_Unigene_038182;OP_Unigene_047490;OP_Unigene_047868;OP_Unigene_097765;OP_Unigene_111621;OP_Unigene_113792;OP_Unigene_117326;OP_Unigene_122637;OP_Unigene_123326;OP_Unigene_127952;OP_Unigene_130356;OP_Unigene_183133;OP_Unigene_189870	K00995+K00006+K13508+K13508+K01114+K00894+K00894+K13508+K01115+K14674+K14674+K06130+K01047+K00968+K01114+K14674+K01115+K14674+K14156+K13508
MA-T1 vs. MA-T2_down
Carbon fixation in photosynthetic organisms	ko00710	32	145	2.38481e-10	2.28942e-08	3.50292	OP_Unigene_000202;OP_Unigene_003604;OP_Unigene_009138;OP_Unigene_017402;OP_Unigene_017481;OP_Unigene_018151;OP_Unigene_018372;OP_Unigene_019190;OP_Unigene_020890;OP_Unigene_021306;OP_Unigene_022222;OP_Unigene_024673;OP_Unigene_027627;OP_Unigene_028492;OP_Unigene_028723;OP_Unigene_031979;OP_Unigene_034011;OP_Unigene_035950;OP_Unigene_036889;OP_Unigene_036890;OP_Unigene_037507;OP_Unigene_039452;OP_…	K01623+K01100+K05298+K01623+K00134+K01006+K00927+K03841+K01595+K03841+K01623+K01623+K01803+K00615+K01100+K05298+K01100+K14272+K01623+K01623+K00855+K00927+K03841+K00615+K00025+K03841+K00026+K01623+K05298+K14272+K01602+K03841
Protein processing in endoplasmic reticulum	ko04141	72	369	0	0	3.09709	OP_Unigene_000595;OP_Unigene_003736;OP_Unigene_004077;OP_Unigene_007696;OP_Unigene_009048;OP_Unigene_012619;OP_Unigene_012731;OP_Unigene_013562;OP_Unigene_014963;OP_Unigene_015516;OP_Unigene_017690;OP_Unigene_018178;OP_Unigene_018299;OP_Unigene_018441;OP_Unigene_019024;OP_Unigene_019325;OP_Unigene_020475;OP_Unigene_023479;OP_Unigene_023742;OP_Unigene_025547;OP_Unigene_025673;OP_Unigene_026927;OP_…	K09486+K10956+K13993+K09517+K09562+K03283+K08057+K08653+K09487+K03283+K08057+K07953+K04079+K07342+K04079+K13993+K06689+K10956+K10956+K09490+K03283+K03283+K09490+K09490+K09503+K13993+K04079+K04079+K13993+K03283+K13989+K03283+K08054+K13993+K04079+K13993+K03283+K03283+K09503+K13525+K08054+K10839+K16196+K09487+K04079+K13993+K13993+K04079+K13993+K13993+K03283+K13993+K13993+K03283+K13993+K06689+K04079+…
Plant-pathogen interaction	ko04626	37	218	2.1357e-08	2.05027e-06	2.69398	OP_Unigene_014680;OP_Unigene_014963;OP_Unigene_017866;OP_Unigene_018299;OP_Unigene_019024;OP_Unigene_019405;OP_Unigene_020667;OP_Unigene_025300;OP_Unigene_026569;OP_Unigene_030270;OP_Unigene_030728;OP_Unigene_032097;OP_Unigene_032432;OP_Unigene_034421;OP_Unigene_035451;OP_Unigene_039434;OP_Unigene_042009;OP_Unigene_042110;OP_Unigene_045357;OP_Unigene_047442;OP_Unigene_085767;OP_Unigene_108980;OP_…	K13424+K09487+K18835+K04079+K04079+K13424+K13424+K13449+K00864+K13434+K12795+K04079+K12795+K04079+K13436+K04079+K13436+K13412+K09487+K04079+K13448+K04079+K13448+K13448+K13412+K04079+K13414+K04079+K00864+K05391+K05391+K13456+K09487+K09487+K04079+K02183+K12795
Pentose phosphate pathway	ko00030	19	110	4.84206e-05	0.00464838	2.74163	OP_Unigene_000202;OP_Unigene_017402;OP_Unigene_019190;OP_Unigene_021306;OP_Unigene_022222;OP_Unigene_024673;OP_Unigene_028492;OP_Unigene_036889;OP_Unigene_036890;OP_Unigene_041607;OP_Unigene_045805;OP_Unigene_108828;OP_Unigene_112977;OP_Unigene_123894;OP_Unigene_126046;OP_Unigene_185744;OP_Unigene_189757;OP_Unigene_197186;OP_Unigene_197418	K01623+K01623+K03841+K03841+K01623+K01623+K00615+K01623+K01623+K03841+K00615+K03841+K00036+K01623+K00616+K00850+K03841+K00850+K00036
Glycine, serine and threonine metabolism	ko00260	18	114	0.000248935	0.0238977	2.5062	OP_Unigene_013191;OP_Unigene_017176;OP_Unigene_018319;OP_Unigene_020632;OP_Unigene_027324;OP_Unigene_035950;OP_Unigene_037571;OP_Unigene_039019;OP_Unigene_039767;OP_Unigene_044182;OP_Unigene_045044;OP_Unigene_121746;OP_Unigene_123810;OP_Unigene_126416;OP_Unigene_127549;OP_Unigene_127969;OP_Unigene_130455;OP_Unigene_190036	K02437+K00830+K00281+K15893+K00827+K14272+K15893+K15634+K01696+K00276+K00605+K00276+K00276+K00382+K00281+K14272+K00281+K00600
Glycolysis / Gluconeogenesis	ko00010	28	227	0.000448741	0.0430792	1.95786	OP_Unigene_000202;OP_Unigene_017402;OP_Unigene_017441;OP_Unigene_017481;OP_Unigene_017889;OP_Unigene_018372;OP_Unigene_019190;OP_Unigene_021306;OP_Unigene_022222;OP_Unigene_024673;OP_Unigene_027627;OP_Unigene_029783;OP_Unigene_036094;OP_Unigene_036889;OP_Unigene_036890;OP_Unigene_039019;OP_Unigene_039452;OP_Unigene_040454;OP_Unigene_041607;OP_Unigene_108828;OP_Unigene_117795;OP_Unigene_120272;OP_…	K01623+K01623+K00162+K00134+K00016+K00927+K03841+K03841+K01623+K01623+K01803+K00873+K00001+K01623+K01623+K15634+K00927+K01792+K03841+K03841+K01895+K00121+K01623+K00001+K00382+K00850+K03841+K00850
Fructose and mannose metabolism	ko00051	18	120	0.000475067	0.0456064	2.38089	OP_Unigene_000202;OP_Unigene_016723;OP_Unigene_017402;OP_Unigene_019190;OP_Unigene_021306;OP_Unigene_022222;OP_Unigene_024673;OP_Unigene_027627;OP_Unigene_036889;OP_Unigene_036890;OP_Unigene_041607;OP_Unigene_043115;OP_Unigene_108828;OP_Unigene_123894;OP_Unigene_127752;OP_Unigene_185744;OP_Unigene_189757;OP_Unigene_197186	K01623+K00847+K01623+K03841+K03841+K01623+K01623+K01803+K01623+K01623+K03841+K00847+K03841+K01623+K00847+K00850+K03841+K00850
AE-T1 vs. AE-T2_up
Circadian rhythm - plant	ko04712	16	89	5.037e-06	0.000538959	3.68219	OP_Unigene_030570;OP_Unigene_031902;OP_Unigene_034720;OP_Unigene_035309;OP_Unigene_042550;OP_Unigene_042551;OP_Unigene_045276;OP_Unigene_046035;OP_Unigene_114826;OP_Unigene_114850;OP_Unigene_127808;OP_Unigene_128288;OP_Unigene_129550;OP_Unigene_130720;OP_Unigene_130721;OP_Unigene_192844	K12124+K03115+K12120+K12124+K12130+K12130+K12130+K12129+K12124+K12124+K12129+K12116+K12130+K12120+K12120+K12124
Phenylpropanoid biosynthesis	ko00940	26	212	1.18989e-05	0.00127318	2.51197	OP_Unigene_010075;OP_Unigene_011648;OP_Unigene_013870;OP_Unigene_020925;OP_Unigene_028186;OP_Unigene_029662;OP_Unigene_034996;OP_Unigene_036983;OP_Unigene_037293;OP_Unigene_038755;OP_Unigene_039223;OP_Unigene_043077;OP_Unigene_047948;OP_Unigene_110811;OP_Unigene_113886;OP_Unigene_115021;OP_Unigene_116009;OP_Unigene_116744;OP_Unigene_122091;OP_Unigene_124757;OP_Unigene_124992;OP_Unigene_129774;OP_…	K01188+K09753+K05349+K12355+K13065+K00430+K00430+K00430+K05349+K12355+K00430+K00083+K10775+K05350+K00430+K00430+K01904+K09753+K05350+K05349+K00083+K01904+K00430+K00083+K13065+K00430
Starch and sucrose metabolism	ko00500	37	373	2.56546e-05	0.00274505	2.03175	OP_Unigene_004785;OP_Unigene_007408;OP_Unigene_010075;OP_Unigene_012466;OP_Unigene_013870;OP_Unigene_014431;OP_Unigene_016756;OP_Unigene_018846;OP_Unigene_019929;OP_Unigene_027191;OP_Unigene_027964;OP_Unigene_028295;OP_Unigene_028321;OP_Unigene_036896;OP_Unigene_037293;OP_Unigene_038832;OP_Unigene_041870;OP_Unigene_046094;OP_Unigene_102610;OP_Unigene_102876;OP_Unigene_110811;OP_Unigene_116439;OP_…	K19893+K15920+K01188+K01193+K05349+K20848+K01187+K01194+K01087+K00012+K08679+K01177+K01177+K13648+K05349+K08679+K13648+K15920+K01087+K01177+K05350+K01193+K20848+K05350+K05349+K01087+K00844+K15920+K20867+K01177+K20867+K13648+K01193+K00975+K01193+K01213+K00688
Plant hormone signal transduction	ko04075	32	339	0.000233109	0.0249427	1.93342	OP_Unigene_001338;OP_Unigene_002484;OP_Unigene_012169;OP_Unigene_013438;OP_Unigene_015050;OP_Unigene_017570;OP_Unigene_019885;OP_Unigene_025592;OP_Unigene_027054;OP_Unigene_027334;OP_Unigene_028146;OP_Unigene_032660;OP_Unigene_034587;OP_Unigene_037588;OP_Unigene_037601;OP_Unigene_038964;OP_Unigene_042667;OP_Unigene_046705;OP_Unigene_117685;OP_Unigene_118378;OP_Unigene_119291;OP_Unigene_120141;OP_…	K13464+K14488+K14488+K14491+K14491+K14484+K14498+K14432+K13415+K14432+K13946+K14490+K14496+K14498+K14488+K14497+K14504+K14514+K14432+K13422+K14498+K14505+K14484+K14432+K14488+K14498+K14486+K14497+K14486+K14496+K14488+K13946
AE-T1 vs. AE-T2_down
Protein processing in endoplasmic reticulum	ko04141	53	369	1.21558e-12	1.17912e-10	3.76768	OP_Unigene_001015;OP_Unigene_004077;OP_Unigene_009048;OP_Unigene_012619;OP_Unigene_015516;OP_Unigene_017690;OP_Unigene_018131;OP_Unigene_018299;OP_Unigene_019325;OP_Unigene_020475;OP_Unigene_025547;OP_Unigene_025673;OP_Unigene_026927;OP_Unigene_030094;OP_Unigene_030480;OP_Unigene_031511;OP_Unigene_032097;OP_Unigene_033345;OP_Unigene_034421;OP_Unigene_034556;OP_Unigene_035364;OP_Unigene_039086;OP_…	K09487+K13993+K09562+K03283+K03283+K08057+K07151+K04079+K13993+K06689+K09490+K03283+K03283+K09490+K09503+K13993+K04079+K13993+K04079+K13993+K03283+K08054+K13993+K04079+K13993+K03283+K03283+K16196+K09487+K04079+K13993+K04079+K13993+K13993+K03283+K13993+K03283+K13993+K13993+K04079+K13993+K04079+K10839+K09562+K08057+K13993+K08054+K03283+K04079+K13993+K08054+K13993+K13993
Fructose and mannose metabolism	ko00051	18	120	5.47432e-07	5.31009e-05	3.93474	OP_Unigene_000202;OP_Unigene_011124;OP_Unigene_019190;OP_Unigene_019923;OP_Unigene_024673;OP_Unigene_035330;OP_Unigene_036889;OP_Unigene_036890;OP_Unigene_038063;OP_Unigene_041607;OP_Unigene_043115;OP_Unigene_047778;OP_Unigene_048315;OP_Unigene_108828;OP_Unigene_121544;OP_Unigene_123894;OP_Unigene_190429;OP_Unigene_197186	K01623+K19355+K03841+K00850+K01623+K19355+K01623+K01623+K00966+K03841+K00847+K19355+K19355+K03841+K00966+K01623+K19355+K00850
Carbon fixation in photosynthetic organisms	ko00710	19	145	2.19679e-06	0.000213089	3.43724	OP_Unigene_000202;OP_Unigene_009138;OP_Unigene_015127;OP_Unigene_017481;OP_Unigene_018151;OP_Unigene_019190;OP_Unigene_020890;OP_Unigene_024673;OP_Unigene_028492;OP_Unigene_028723;OP_Unigene_031979;OP_Unigene_035950;OP_Unigene_036889;OP_Unigene_036890;OP_Unigene_039452;OP_Unigene_041607;OP_Unigene_108828;OP_Unigene_121803;OP_Unigene_123894	K01623+K05298+K01807+K00134+K01006+K03841+K01595+K01623+K00615+K01100+K05298+K14272+K01623+K01623+K00927+K03841+K03841+K00026+K01623
Plant-pathogen interaction	ko04626	24	218	2.4675e-06	0.000239347	2.88788	OP_Unigene_001015;OP_Unigene_018299;OP_Unigene_020667;OP_Unigene_026569;OP_Unigene_030270;OP_Unigene_030728;OP_Unigene_032097;OP_Unigene_032432;OP_Unigene_034421;OP_Unigene_038416;OP_Unigene_039434;OP_Unigene_042009;OP_Unigene_045357;OP_Unigene_047442;OP_Unigene_108980;OP_Unigene_112710;OP_Unigene_123175;OP_Unigene_123293;OP_Unigene_123896;OP_Unigene_124258;OP_Unigene_126171;OP_Unigene_130230;OP_…	K09487+K04079+K13424+K00864+K13434+K12795+K04079+K12795+K04079+K13448+K04079+K13436+K09487+K04079+K04079+K13458+K13458+K04079+K04079+K00864+K05391+K04079+K02183+K13448
Pentose phosphate pathway	ko00030	13	110	0.000262004	0.0254144	3.1001	OP_Unigene_000202;OP_Unigene_015127;OP_Unigene_019190;OP_Unigene_019923;OP_Unigene_024673;OP_Unigene_028492;OP_Unigene_036889;OP_Unigene_036890;OP_Unigene_041607;OP_Unigene_108828;OP_Unigene_123894;OP_Unigene_128399;OP_Unigene_197186	K01623+K01807+K03841+K00850+K01623+K00615+K01623+K01623+K03841+K03841+K01623+K00948+K00850
MA-T3 vs. MA-T4_up
Phenylpropanoid biosynthesis	ko00940	13	182	3.6453e-06	0.000204137	4.65087	CL_Unigene_004453;CL_Unigene_010765;CL_Unigene_057135;CL_Unigene_090590;CL_Unigene_096982;CL_Unigene_097428;CL_Unigene_162180;CL_Unigene_164388;CL_Unigene_172993;CL_Unigene_173465;CL_Unigene_176208;CL_Unigene_177018;CL_Unigene_179325	K05349+K00430+K00430+K05349+K01188+K00430+K00430+K00430+K00083+K00430+K01188+K01188+K00083
Ribosome	ko03010	21	608	0.000306906	0.0171868	2.24894	CL_Unigene_021762;CL_Unigene_023635;CL_Unigene_026908;CL_Unigene_026958;CL_Unigene_027353;CL_Unigene_027766;CL_Unigene_029283;CL_Unigene_030404;CL_Unigene_031343;CL_Unigene_031386;CL_Unigene_057082;CL_Unigene_065249;CL_Unigene_079733;CL_Unigene_083776;CL_Unigene_083873;CL_Unigene_083970;CL_Unigene_088027;CL_Unigene_089059;CL_Unigene_097116;CL_Unigene_111821;CL_Unigene_127013	K02896+K02975+K02872+K02873+K02995+K02964+K02998+K02949+K02940+K02885+K02901+K02918+K02908+K02987+K02882+K02912+K02893+K02991+K02941+K02947+K02865
MA-T3 vs. MA-T4_down
Starch and sucrose metabolism	ko00500	10	340	0.0118864	0.665639	2.2768	CL_Unigene_003219;CL_Unigene_021898;CL_Unigene_034024;CL_Unigene_094814;CL_Unigene_096818;CL_Unigene_143087;CL_Unigene_177421;CL_Unigene_181218;CL_Unigene_186900;CL_Unigene_234675	K01188+K01193+K01193+K00696+K00705+K05349+K00696+K01184+K00705+K01193
Phenylpropanoid biosynthesis	ko00940	9	182	0.000531057	0.0297392	3.82802	CL_Unigene_003219;CL_Unigene_014196;CL_Unigene_030578;CL_Unigene_058743;CL_Unigene_058958;CL_Unigene_121669;CL_Unigene_143087;CL_Unigene_177573;CL_Unigene_179540	K01188+K00588+K00430+K01904+K00588+K13065+K05349+K01904+K00083
Protein processing in endoplasmic reticulum	ko04141	9	306	0.0168099	0.941352	2.2768	CL_Unigene_005746;CL_Unigene_033888;CL_Unigene_043237;CL_Unigene_057059;CL_Unigene_089015;CL_Unigene_093359;CL_Unigene_096362;CL_Unigene_172438;CL_Unigene_179422	K10956+K09490+K09523+K10088+K13993+K09490+K09490+K10956+K13993
AE-T3 vs. AE-T4_up
Starch and sucrose metabolism	ko00500	22	340	4.85905e-07	3.40134e-05	3.3393	CL_Unigene_001931;CL_Unigene_004729;CL_Unigene_010972;CL_Unigene_012336;CL_Unigene_026027;CL_Unigene_039772;CL_Unigene_058813;CL_Unigene_060053;CL_Unigene_084315;CL_Unigene_090590;CL_Unigene_094955;CL_Unigene_096982;CL_Unigene_114533;CL_Unigene_168940;CL_Unigene_173509;CL_Unigene_174597;CL_Unigene_177018;CL_Unigene_177204;CL_Unigene_178118;CL_Unigene_179669;CL_Unigene_181218;CL_Unigene_183487	K01193+K00975+K16055+K00696+K01051+K01184+K01184+K01184+K01193+K05349+K00695+K01188+K05350+K01176+K01188+K01213+K01188+K16055+K01051+K01051+K01184+K01188
Plant hormone signal transduction	ko04075	19	309	6.774e-06	0.00047418	3.17327	CL_Unigene_020869;CL_Unigene_027174;CL_Unigene_027316;CL_Unigene_035675;CL_Unigene_045684;CL_Unigene_047152;CL_Unigene_057293;CL_Unigene_080950;CL_Unigene_086684;CL_Unigene_093705;CL_Unigene_094699;CL_Unigene_163394;CL_Unigene_176229;CL_Unigene_176284;CL_Unigene_176285;CL_Unigene_178702;CL_Unigene_181402;CL_Unigene_181490;CL_Unigene_234953	K14491+K13464+K14488+K14487+K14487+K14490+K14487+K14504+K14487+K14488+K14487+K14488+K14488+K14487+K14487+K16189+K14514+K14488+K14488
Pentose and glucuronate interconversions	ko00040	10	121	0.000108803	0.00761621	4.26507	CL_Unigene_013421;CL_Unigene_026027;CL_Unigene_039772;CL_Unigene_058813;CL_Unigene_060053;CL_Unigene_062801;CL_Unigene_174597;CL_Unigene_178118;CL_Unigene_179669;CL_Unigene_181218	K00128+K01051+K01184+K01184+K01184+K01728+K01213+K01051+K01051+K01184
AE-T3 vs. AE-T4_down
Pentose and glucuronate interconversions	ko00040	27	121	1.4877e-14	1.33893e-12	6.26863	CL_Unigene_006398;CL_Unigene_006406;CL_Unigene_012250;CL_Unigene_021557;CL_Unigene_025071;CL_Unigene_027947;CL_Unigene_031483;CL_Unigene_031612;CL_Unigene_032798;CL_Unigene_038587;CL_Unigene_040130;CL_Unigene_041276;CL_Unigene_044910;CL_Unigene_057756;CL_Unigene_089142;CL_Unigene_094242;CL_Unigene_095338;CL_Unigene_096474;CL_Unigene_127777;CL_Unigene_140012;CL_Unigene_173848;CL_Unigene_175463;CL_…	K00128+K01051+K01051+K01728+K01728+K01051+K01213+K01051+K01051+K01213+K01728+K00128+K01728+K01728+K01051+K01051+K01728+K01051+K01213+K01051+K01051+K01051+K01051+K01728+K01728+K01051+K01051
Phenylpropanoid biosynthesis	ko00940	23	182	9.74631e-08	8.77168e-06	3.55018	CL_Unigene_006453;CL_Unigene_009702;CL_Unigene_016252;CL_Unigene_024879;CL_Unigene_032210;CL_Unigene_032393;CL_Unigene_057135;CL_Unigene_057254;CL_Unigene_062855;CL_Unigene_090650;CL_Unigene_113152;CL_Unigene_143087;CL_Unigene_163280;CL_Unigene_164388;CL_Unigene_172055;CL_Unigene_172811;CL_Unigene_176203;CL_Unigene_178348;CL_Unigene_179453;CL_Unigene_179883;CL_Unigene_182808;CL_Unigene_185435;CL_…	K10775+K01904+K10775+K05350+K12355+K00083+K00430+K10775+K01904+K13065+K09753+K05349+K10775+K00430+K00430+K00430+K10775+K01904+K00430+K10775+K10775+K13065+K00487
Starch and sucrose metabolism	ko00500	30	340	3.1693e-06	0.000285237	2.47877	CL_Unigene_006406;CL_Unigene_012250;CL_Unigene_021898;CL_Unigene_024879;CL_Unigene_027947;CL_Unigene_031483;CL_Unigene_031612;CL_Unigene_032798;CL_Unigene_033201;CL_Unigene_038435;CL_Unigene_038587;CL_Unigene_065079;CL_Unigene_065583;CL_Unigene_083301;CL_Unigene_089142;CL_Unigene_091853;CL_Unigene_094242;CL_Unigene_096474;CL_Unigene_114101;CL_Unigene_127777;CL_Unigene_140012;CL_Unigene_143087;CL_…	K01051+K01051+K01193+K05350+K01051+K01213+K01051+K01051+K01087+K00847+K01213+K01087+K01177+K08679+K01051+K08679+K01051+K01051+K08679+K01213+K01051+K05349+K01179+K01051+K01051+K01051+K01177+K01051+K01051+K01193
Phenylalanine metabolism	ko00360	11	57	4.02635e-06	0.000362371	5.42141	CL_Unigene_006453;CL_Unigene_009702;CL_Unigene_016252;CL_Unigene_057254;CL_Unigene_062855;CL_Unigene_163280;CL_Unigene_176203;CL_Unigene_178348;CL_Unigene_179883;CL_Unigene_182808;CL_Unigene_185612	K10775+K01904+K10775+K10775+K01904+K10775+K10775+K01904+K10775+K10775+K00487
Plant-pathogen interaction	ko04626	21	202	8.84184e-06	0.000795766	2.92053	CL_Unigene_019278;CL_Unigene_022553;CL_Unigene_045821;CL_Unigene_066250;CL_Unigene_078918;CL_Unigene_083993;CL_Unigene_084828;CL_Unigene_088862;CL_Unigene_091643;CL_Unigene_092545;CL_Unigene_093553;CL_Unigene_096776;CL_Unigene_097514;CL_Unigene_158797;CL_Unigene_166195;CL_Unigene_174558;CL_Unigene_176332;CL_Unigene_176806;CL_Unigene_177703;CL_Unigene_178855;CL_Unigene_178856	K04079+K13412+K13448+K13424+K13448+K13412+K13412+K13448+K13412+K13412+K05391+K13448+K13412+K13448+K02183+K13448+K18835+K13412+K13424+K13412+K13412
