# Supplementary material for: The Mechanism of Flower Opening and Closing Times Revealed By Transcriptome Profiling
Source: Research Square preprint supplement (doi:10.21203/rs.3.rs-1043621/v1), 2021-11-16
Supplement: Supplementary file 2 [file e4a62913835a6e6e756c4a07.xlsx]

## Sheet: Sheet1
Table S2. Summary of Illumina transcriptome sequencing
	No. of clean reads	No. of bases	GC percentage(%)	Q30 percentage (%)
MA-T1 and T2	130705691	39119142166	50.08	93.88
AE-T1 and T2	126431320	37823383654	50.03	93.94
MA-T3 and T4	138068167	41317710202	50.64	95.54
AE-T3 and T4	140478037	42025629462	49.61	92.22
Total	535683215	160285865484	50.09	93.9
