# Supplementary material for: The Mechanism of Flower Opening and Closing Times Revealed By Transcriptome Profiling
Source: Research Square preprint supplement (doi:10.21203/rs.3.rs-1043621/v1), 2021-11-16
Supplement: Supplementary file 3 [file f9425ea6c3aacc7efd3cf411.xlsx]

## Sheet: Sheet1
Table S5. Statistical analysis of DEG annotation in different comparisons
	MA-T1 vs. MA-T2	AE-T1 vs. AE-T2	MA-T3 vs. MA-T4	AE-T3 vs. AE-T4
Nr	4525	3674	818	1915
Swiss-prot	3484	2779	639	1547
GO	2623	2088	488	1094
KEGG	1610	1269	305	668
COG	1734	1340	366	794
Pfam	3449	2779	668	1592
Total	4581	3718	828	1948
